# Supplementary material for: Assessment of the Future Impact of Climate Change on the Hydrology of the Mangoky River, Madagascar Using ANN and SWAT
Source: MDPI journal article supplement (doi:10.3390/w13091239), 2021-04-29
Supplement: s1 [file s1]

Archive with 1 entries (1 files):
- water-1175721 - final suppl. revised.pdf
