# Supplementary material for: Assessment of the Future Impact of Climate Change on the Hydrology of the Mangoky River, Madagascar Using ANN and SWAT
Source: MDPI journal article supplement (doi:10.3390/w13091239), 2021-04-29
Supplement: s1 [file s1 › water-1175721 - final suppl. revised.pdf]

## Supplementary Materials

# Assessment of the Future Impact of Climate Change on the Hydrology of the Mangoky River, Madagascar Using ANN and SWAT

**Table S1.** List of predictors from NCEP/NCAR.

| n° | Code | Description                                    | n° | Code | Description                              |
|----|------|------------------------------------------------|----|------|------------------------------------------|
| 1  | mslp | Mean sea level pressure                        | 14 | p8_f | Geostrophic airflow velocity at 850 hPa  |
| 2  | p_f  | Geostrophic airflow velocity near the surface  | 15 | p8_u | Zonal velocity component at 850 hPa      |
| 3  | p_u  | Zonal velocity component near the surface      | 16 | p8_v | Meridional velocity component at 850 hPa |
| 4  | p_v  | Meridional velocity component near the surface | 17 | p8_z | Vorticity at 850 hPa                     |
| 5  | p_z  | Vorticity near the surface                     | 18 | p8th | Wind direction at 850 hPa                |
| 6  | p_th | Wind direction near the surface                | 19 | p8zh | Divergence at 850 hPa                    |
| 7  | p_zh | Divergence near the surface                    | 20 | p500 | 500 hPa geopotential height              |
| 8  | p5_f | Geostrophic airflow velocity at 500 hPa        | 21 | p850 | 850 hPa geopotential height              |
| 9  | p5_u | Zonal velocity component at 500 hPa            | 22 | r500 | Relative humidity at 500 hPa height      |
| 10 | p5_v | Meridional velocity component at 500 hPa       | 23 | R850 | Relative humidity at 850 hPa height      |
| 11 | p5_z | Vorticity at 500 hPa                           | 24 | rhum | Near surface relative humidity           |
| 12 | p5th | Wind direction at 500 hPa                      | 25 | shum | Near surface specific humidity           |
| 13 | p5zh | Divergence at 500 hPa                          | 26 | temp | Near surface air temperature             |

Figure S1 shows the land use and land cover in the Mangoky watershed. According to Figure S1, the land in the Mangoky includes Pasture (PAST), row crop (AGRR), grasslands/herbaceous (RNGE), range shrubland (RNGB), deciduous forest (FRSD), evergreen forest (FRSE), water (WATR), and barren (BARR). The land use classification is mainly range shrubland with 28395km<sup>2</sup>, accounting for 75.95% of the total area, followed by grasslands/herbaceous with 5218km<sup>2</sup> accounting for 13.96% of the total land area. Pasture occupies 4.50% of the total area with 1681km<sup>2</sup>, and the deciduous forest occupies 2.83% of the total area with 1057km<sup>2</sup>. The rest of the land is water, row crop, and barren with 1.1%, 0.89%, and 0.35% accounting for 410km<sup>2</sup>, 233km<sup>2</sup>, and 129km<sup>2</sup>, respectively.

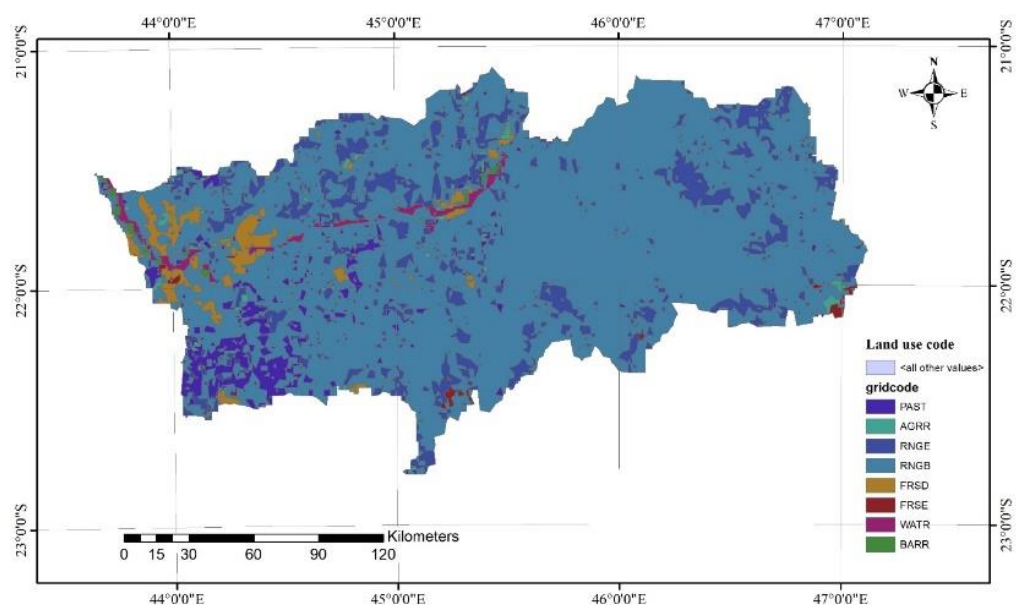

Figure S1. Land use and land cover in the Mangoky basin.

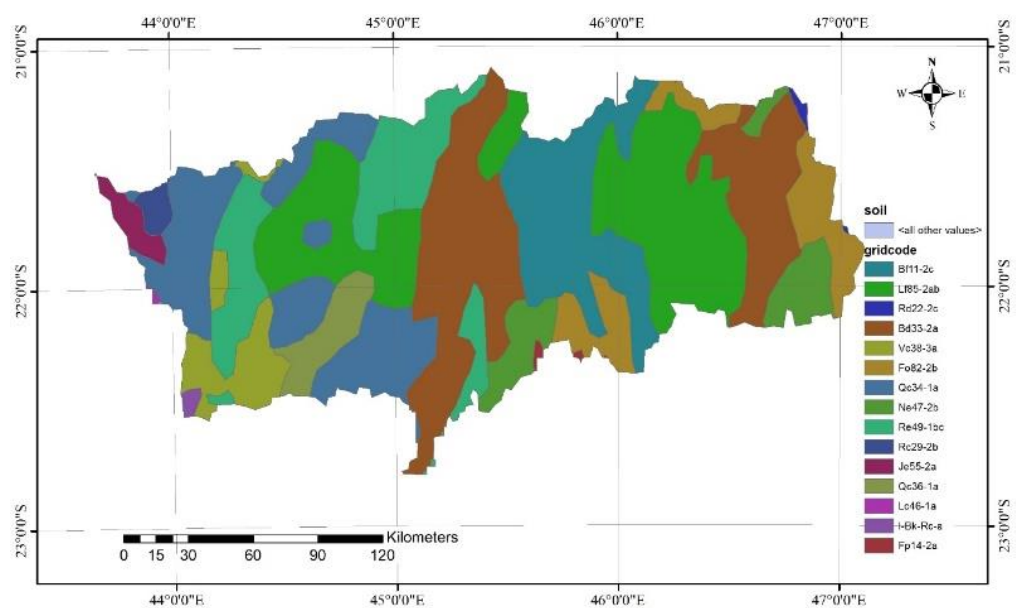

Figure S2. Soil map in Mangoky basin.

**Table S2.** Soil code and lithology in the Mangoky region.

| Soil Code | Associated Soils    | Lithology                                                                                                               | Hydrologic Soil Group |
|-----------|---------------------|-------------------------------------------------------------------------------------------------------------------------|-----------------------|
| Bf11-2c   | Ferralic cambisol   | Granite, Precambrian, amphibolite, pyroxente migmatite, gneiss, Quaternary basalt and acid intrusions                   | C                     |
| Lf85-2ab  | Ferric luvisol      | Pliocene: Sandstone, sand, clay. Triassic, Jurassic, Cretaceous: sandstone. Permian: schist, migmatite, gneiss          | C                     |
| Rd22-2c   | Dystric regosols    | Granite and quartzite. Precambrian: migmatite, gneiss, leptite, pyroxenite, cipolin                                     | C                     |
| Bd33-2a   | Dystric cambisol    | Triassic sandstone: jurassic sandstone; precambrian gneiss and migmatite permian schist                                 | C                     |
| Vc38-3a   | Chromic vertisol    | Jurassic marl and limestone. Cretaceous basalt.                                                                         | D                     |
| Fo82-2b   | Orthic Ferralsol    | Precambrian: migmatite, gneiss, leptite pyroxenite, cipolin; some granitic batholiths                                   | C                     |
| Qc34-1a   | Cambic arenosols    | Pliocene: sand, sandstone, clay. Jurassic and cretaceous: sandstone. Triassic: sandstone. Often overlain by Quaternary. |                       |
| Ne47-2b   | Eutric Nitrosols    | Precambrian: amphibolite pyroxenite, cipolin, gneiss, migmatite, Triassic:sandstone                                     | C                     |
| Re49-1bc  | Eutric regosols     | Triassic and Jurassic: sandstone. Precambrian: gneiss and migmatite                                                     | C                     |
| Rc29-2b   | Calcaric regosols   | Cretaceous limestone                                                                                                    | D                     |
| Jc55-2a   | Calcaric fluvisols  | Quaternary alluvial deposits                                                                                            | C                     |
| Qc36-1a   | Cambic arenosols    | Jurassic sandstone                                                                                                      |                       |
| Lc46-1a   | Chromic luvisols    | Eocene limestone                                                                                                        |                       |
| I-Bk-Re-a | Lithosols           | Eocene calcareous sandstone; Jurassic marl                                                                              | D                     |
| Fp14-2a   | Plinthic ferralsols | Granite. Precambrian: gneiss, migmatite, leptite, pyroxenite, quartzite                                                 | C                     |

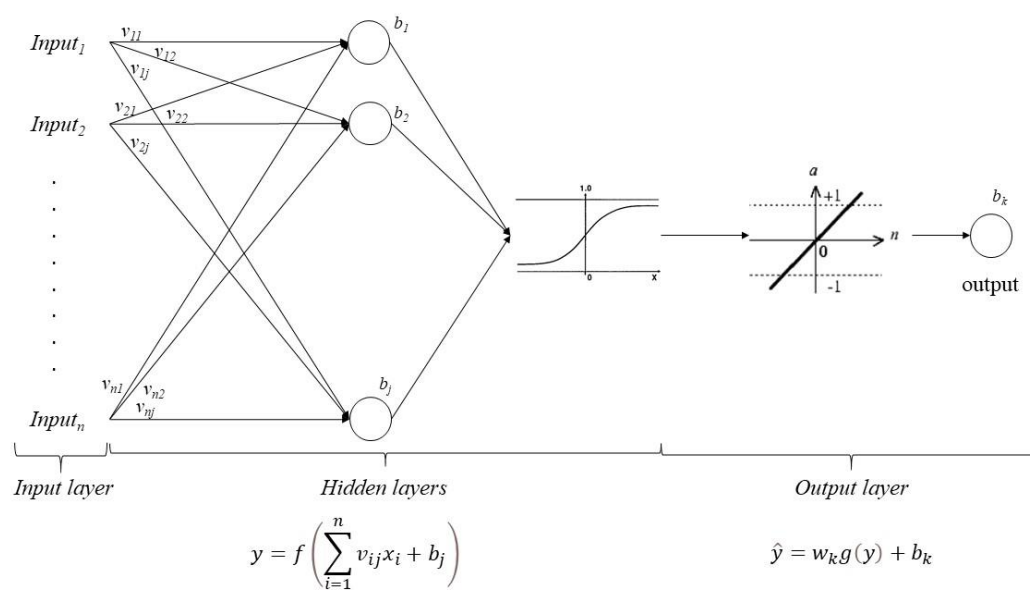

Figure S3. Structure of the ANN developed in this study.

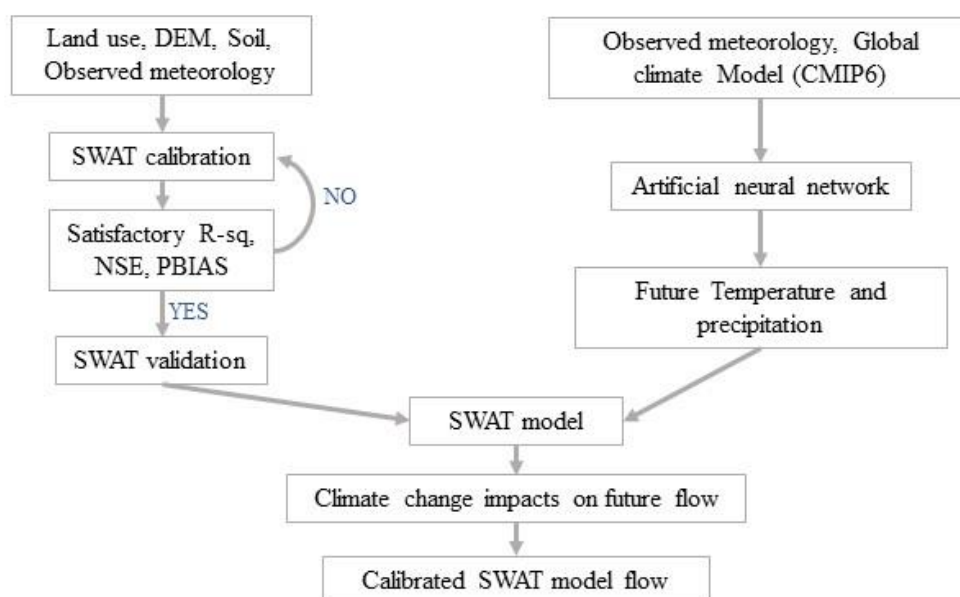

Figure S4. Conceptual model of the present study.

**Table S3.** Correlation matrix between precipitation, maximum and minimum temperature. Values in bold are different from 0 with a significance level  $\alpha = 0.05$ .

| Variables | prec           | Tmax           | Tmin           |
|-----------|----------------|----------------|----------------|
| mslp      | <b>−0.3329</b> | <b>−0.4316</b> | <b>−0.6359</b> |
| p_f       | <b>0.1195</b>  | <b>−0.0578</b> | <b>0.1498</b>  |
| p_u       | <b>0.2644</b>  | <b>0.4614</b>  | <b>0.3700</b>  |
| p_v       | <b>−0.2043</b> | <b>−0.3152</b> | <b>−0.4003</b> |
| p_z       | <b>0.3198</b>  | <b>0.1268</b>  | <b>0.3597</b>  |
| p_th      | <b>−0.2193</b> | <b>−0.4480</b> | <b>−0.4333</b> |
| p_zh      | <b>−0.2236</b> | <b>−0.3121</b> | <b>−0.3887</b> |
| p5_f      | <b>−0.0775</b> | <b>−0.4704</b> | <b>−0.3863</b> |
| p5_u      | <b>−0.0923</b> | <b>−0.5199</b> | <b>−0.4142</b> |
| p5_v      | <b>−0.1639</b> | <b>0.1404</b>  | <b>−0.0430</b> |
| p5_z      | <b>−0.1575</b> | 0.0136         | <b>−0.1130</b> |
| p5th      | <b>0.0699</b>  | <b>0.2864</b>  | <b>0.2254</b>  |
| p5zh      | <b>−0.1589</b> | <b>0.1313</b>  | <b>−0.0431</b> |
| p8_f      | <b>0.2216</b>  | <b>−0.1163</b> | <b>0.1229</b>  |
| p8_u      | <b>0.2015</b>  | 0.0101         | <b>0.0593</b>  |
| p8_v      | <b>−0.2546</b> | <b>−0.1015</b> | <b>−0.1650</b> |
| p8_z      | <b>−0.1629</b> | 0.0007         | <b>−0.1957</b> |
| p8th      | <b>−0.1276</b> | <b>−0.0273</b> | <b>−0.0391</b> |
| p8zh      | <b>−0.2552</b> | <b>−0.1317</b> | <b>−0.1715</b> |
| p500      | <b>−0.0182</b> | <b>0.3738</b>  | <b>0.2339</b>  |
| p850      | <b>−0.3373</b> | <b>−0.2492</b> | <b>−0.5038</b> |
| r500      | <b>0.4267</b>  | <b>0.1591</b>  | <b>0.5282</b>  |
| r850      | <b>0.2513</b>  | <b>−0.0377</b> | <b>0.2740</b>  |
| rhum      | <b>0.3306</b>  | <b>0.2007</b>  | <b>0.5587</b>  |
| shum      | <b>0.3505</b>  | <b>0.5070</b>  | <b>0.7776</b>  |
| temp      | <b>0.1103</b>  | <b>0.6524</b>  | <b>0.5382</b>  |

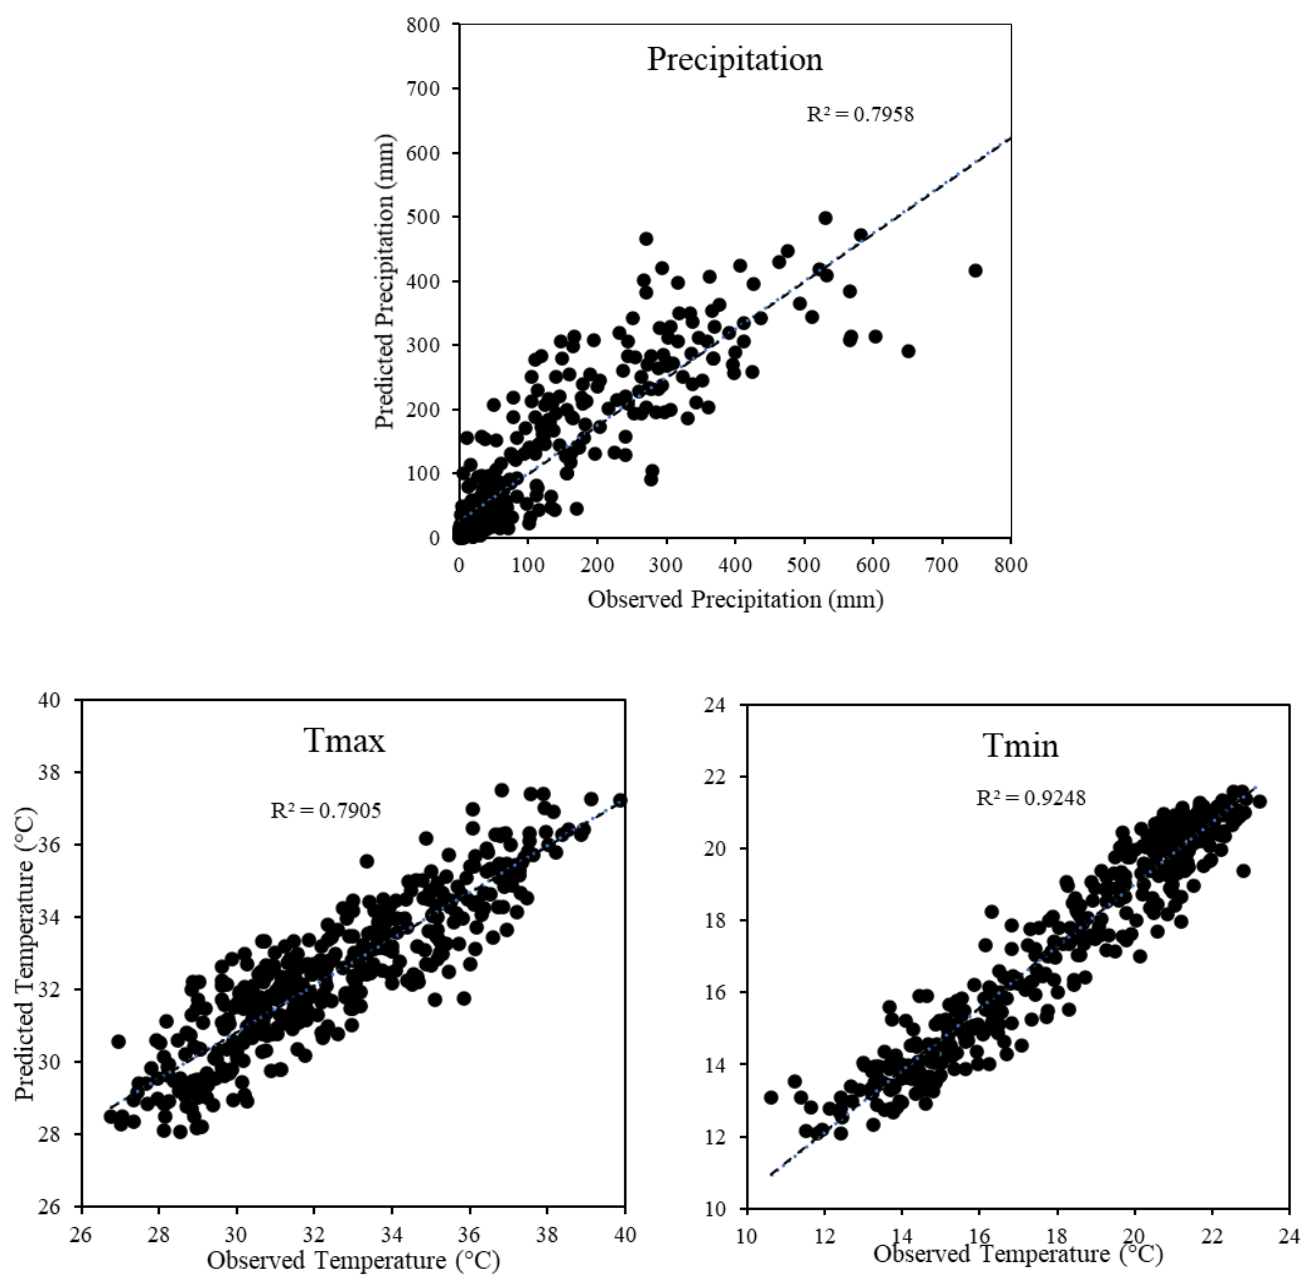

Figure S5. Performance of the ANN (at Station id 214447).

**Equation S1.** Nash and Sutcliffe efficiency:

$$NSE = \frac{\sum_{i=1}^N (Obs_i - Pred_i)^2}{\sum_{i=1}^N (Obs_i - \overline{Obs})^2} \quad (1)$$

**Equation S2.** PBIAS:

$$PBIAS = \frac{\sum_{i=1}^n (Y_i^{obs} - Y_i^{sim}) * 100}{\sum_{i=1}^n Y_i^{obs}} \quad (2)$$

where  $Obs_i$  is the observed data and  $Pred_i$  is the predicted data and  $\overline{Obs}$  is the mean of the observed data. Where  $Y_i^{obs}$  is the observed variable, and  $Y_i^{sim}$  represents the simulated variable.
